# Supplementary material
Source: PubMed Central journal article supplement (PMC5360281)
Supplement: DC161354SupplementaryData.pdf [file DC161354SupplementaryData.pdf]

## SUPPLEMENTARY DATA

### **Extracellular RNAs are associated with insulin resistance and metabolic phenotypes**

Ravi Shah, MD<sup>\*1</sup>, Venkatesh Murthy, MD, PhD<sup>\*2</sup>, Michael Pacold, MD, PhD<sup>\*3</sup>, Kirsty Danielson, PhD<sup>\*1</sup>, Kahraman Tanriverdi, PhD<sup>4</sup>, Martin G. Larson, ScD<sup>5</sup>, Kristina Hanspers, PhD<sup>6</sup>, Alexander Pico, PhD<sup>6</sup>, Eric Mick, ScD<sup>4</sup>, Jared Reis, PhD<sup>7</sup>, Sarah de Ferranti, MD<sup>8</sup>, Elizaveta Freinkman, PhD<sup>3</sup>, Daniel Levy, MD<sup>7</sup>, Udo Hoffmann, MD, MPH<sup>9</sup>, Stavroula Osganian, MD<sup>10</sup>, Saumya Das, MD, PhD<sup>1</sup>, Jane E. Freedman, MD<sup>4</sup>

<sup>1</sup>Department of Medicine, Massachusetts General Hospital, Harvard Medical School, Boston, MA; <sup>2</sup>Department of Medicine and Radiology, University of Michigan-Ann Arbor, Ann Arbor, MI; <sup>3</sup>Metabolomics Core, Whitehead Institute, Massachusetts Institute of Technology, Boston, MA; <sup>4</sup>University of Massachusetts at Worcester, Worcester, MA; <sup>5</sup>Biostatistics Department, Boston University School of Public Health, Boston, MA; <sup>6</sup>Gladstone Institutes, San Francisco, CA; <sup>7</sup>Division of Cardiovascular Sciences, National Heart, Lung, and Blood Institute, Bethesda, MD; <sup>8</sup>Preventative Cardiology, Department of Medicine and Cardiology, Boston Children's Hospital, Boston, MA; <sup>9</sup>Department of Radiology, Massachusetts General Hospital, Boston, MA; <sup>10</sup>Division of General Pediatrics, Department of Medicine, Boston Children's Hospital, Boston, MA

\*Drs. Shah, Murthy, Danielson, and Pacold contributed equally. Drs. Das and Freedman jointly supervised the work.



## SUPPLEMENTARY DATA

**Supplementary Figure 2.** Visualization of selected miRNA targeting events on three selected pathways from WikiPathways. The genes targeted by miRNA per pathway, as counted in **Supplemental Table 3**, are visualized here for selected pathways. Pathway was imported into Cytoscape from WikiPathways and ID mapping was performed to obtain Entrez Gene identifiers for each gene. An intermediate file from the Pathway Finder tool was parsed and imported into Cytoscape to supply the mappings between Entrez Gene and the selected set of miRNAs. A visual style was defined in Cytoscape to highlight any gene targeted by these miRNA in preferential order: miR-122 (blue), miR-192 (red), and any of the other 14 possible miRNAs (gray).

SUPPLEMENTARY DATA

(A) Factors and pathways affecting insulin-like growth factor signaling

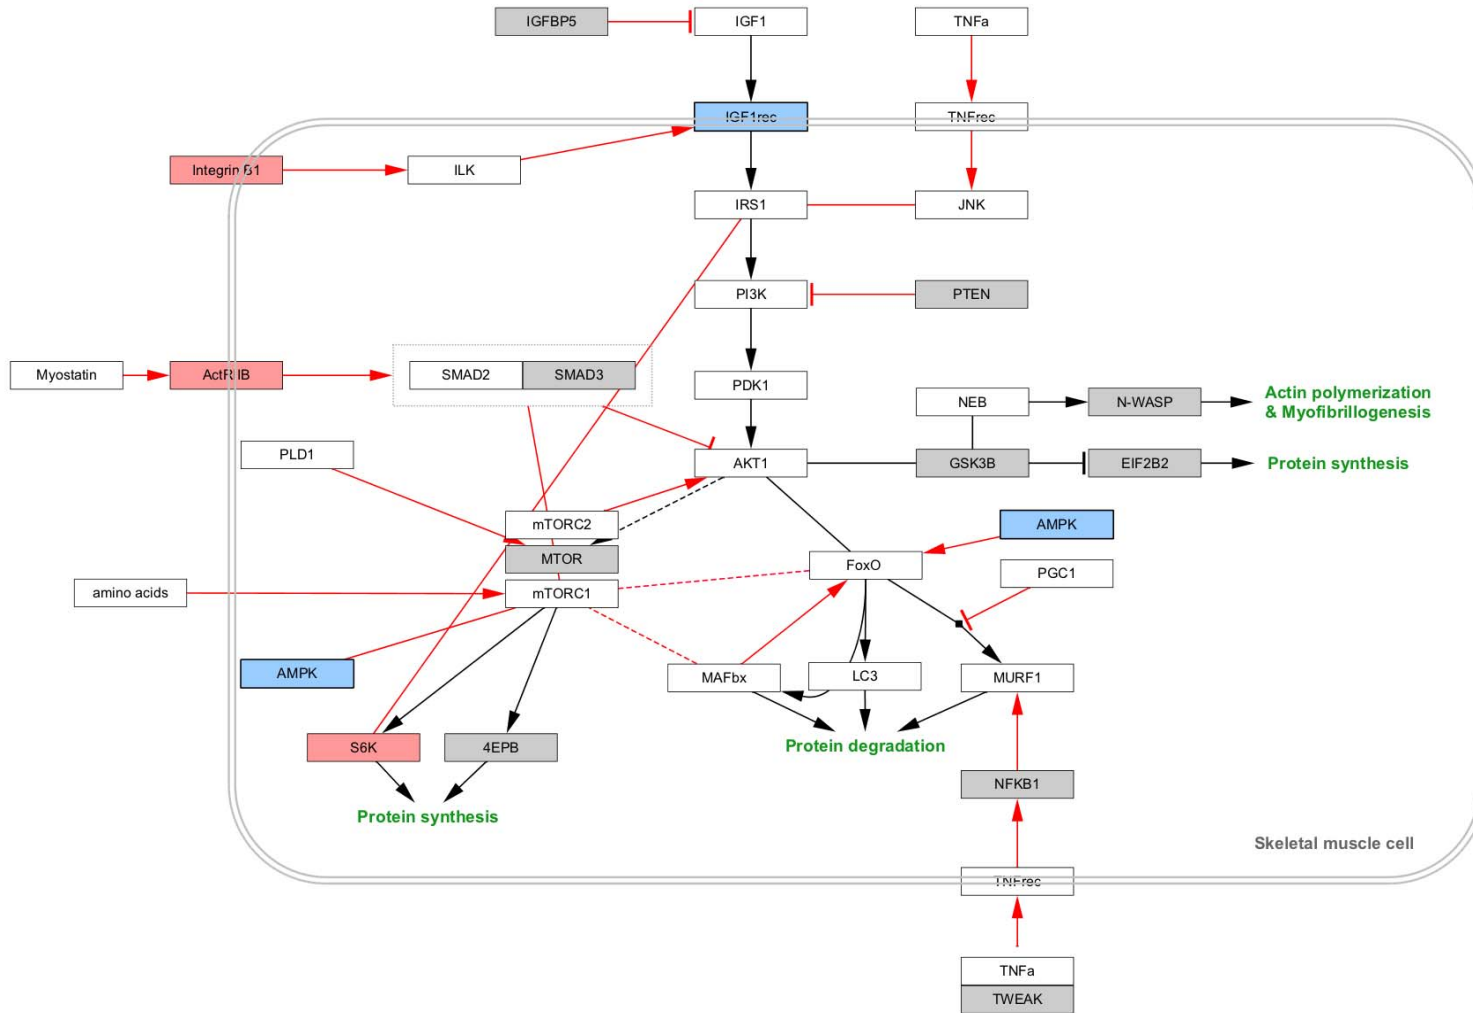

SUPPLEMENTARY DATA

(B) TOR signaling

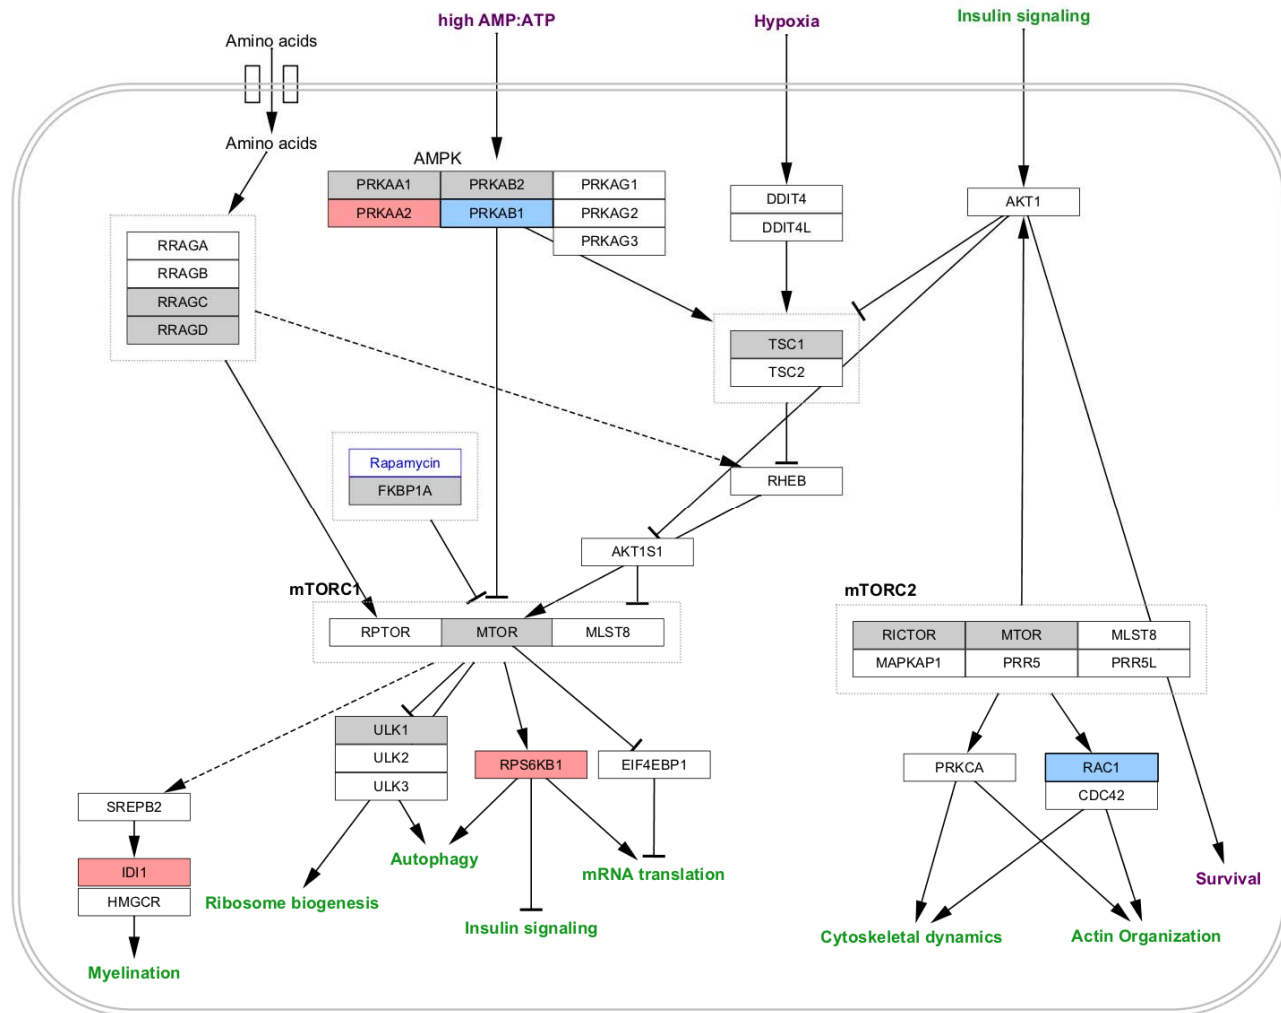

SUPPLEMENTARY DATA

(C) AMP-activated protein kinase signaling

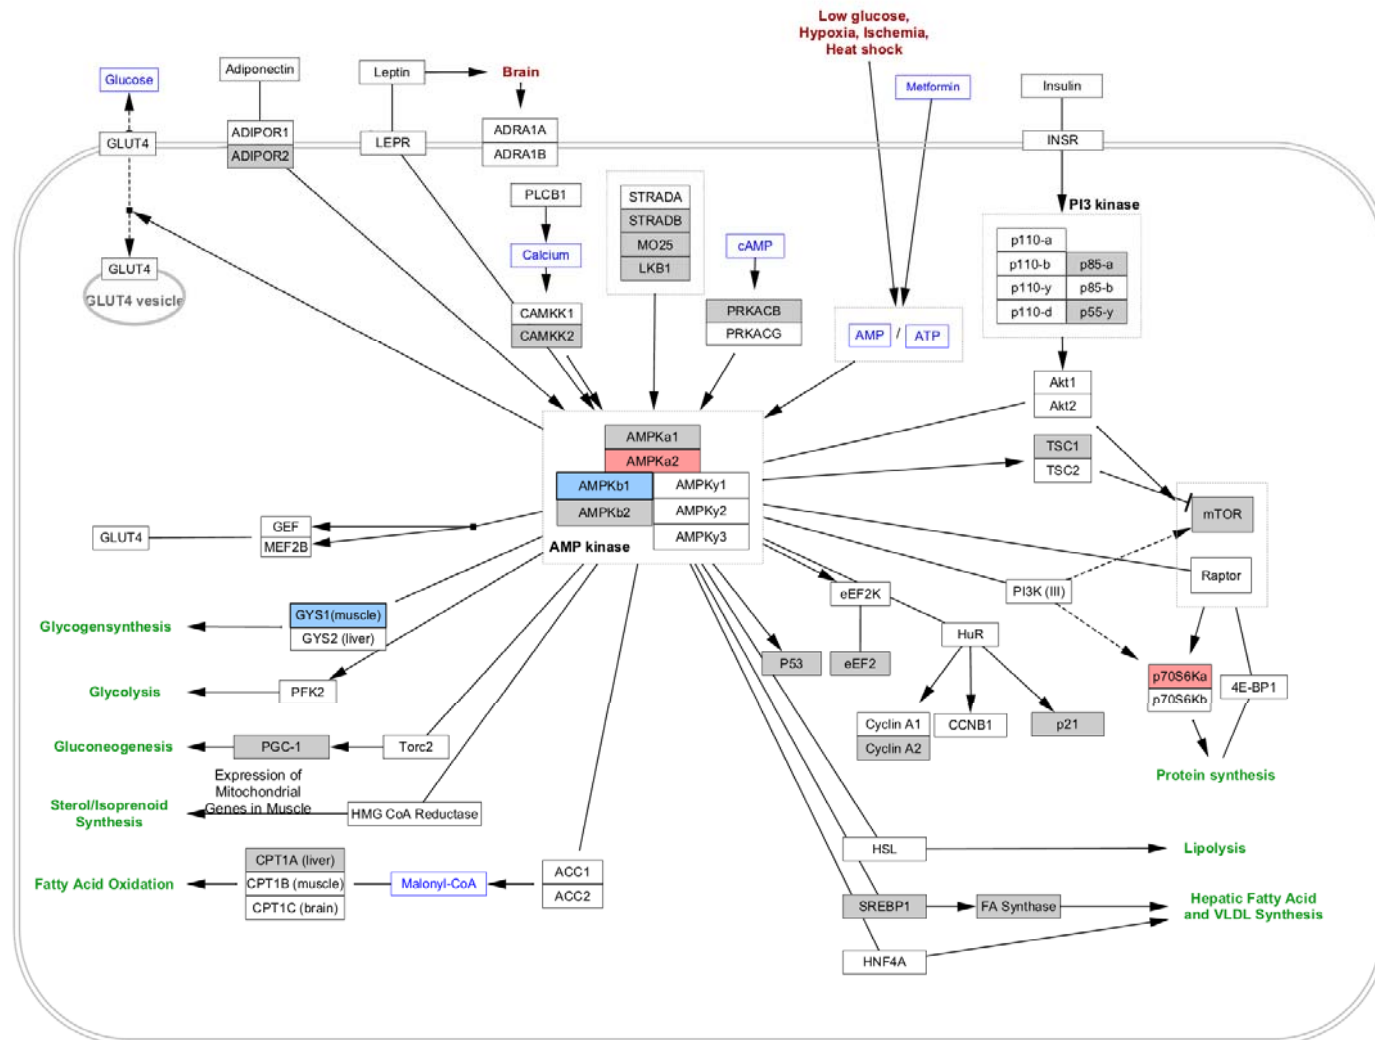

SUPPLEMENTARY DATA

**Supplementary Table 1.** Ex-RNAs detectable in at least 100 FHS participants included in study cohort. Detectable expression is any  $C_q$  value that was detected by the Fluidigm platform ( $6 < C_q < 23$  cycles).

| <b>Variable</b> | <b>N</b> | <b>%<br/>Expressed</b> |
|-----------------|----------|------------------------|
| let-7a-3p       | 695      | 30.0                   |
| let-7a-5p       | 1950     | 84.2                   |
| let-7b-3p       | 760      | 32.8                   |
| let-7b-5p       | 1930     | 83.3                   |
| let-7c-5p       | 1685     | 72.7                   |
| let-7d-3p       | 1798     | 77.6                   |
| let-7d-5p       | 1885     | 81.4                   |
| let-7e-5p       | 1108     | 47.8                   |
| let-7f-1-3p     | 371      | 16.0                   |
| let-7f-2-3p     | 463      | 20.0                   |
| let-7f-5p       | 1545     | 66.7                   |
| let-7g-5p       | 1851     | 79.9                   |
| let-7i-5p       | 1797     | 77.6                   |
| miR-1-3p        | 275      | 11.9                   |
| miR-100-5p      | 1137     | 49.1                   |
| miR-101-3p      | 2126     | 91.8                   |
| miR-103a-3p     | 1893     | 81.7                   |
| miR-106b-3p     | 1603     | 69.2                   |
| miR-106b-5p     | 2192     | 94.6                   |
| miR-107         | 237      | 10.2                   |
| miR-10a-5p      | 669      | 28.9                   |
| miR-10b-5p      | 1102     | 47.6                   |
| miR-1180-3p     | 1018     | 43.9                   |
| miR-122-3p      | 888      | 38.3                   |
| miR-122-5p      | 2201     | 95.0                   |
| miR-1226-3p     | 771      | 33.3                   |
| miR-1229-3p     | 375      | 16.2                   |
| miR-124-3p      | 237      | 10.2                   |
| miR-1246        | 1410     | 60.9                   |
| miR-1247-5p     | 877      | 37.9                   |
| miR-125a-5p     | 1978     | 85.4                   |
| miR-125b-5p     | 1965     | 84.8                   |
| miR-126-3p      | 2243     | 96.8                   |
| miR-126-5p      | 2266     | 97.8                   |
| miR-1260a       | 2163     | 93.4                   |
| miR-1260b       | 1622     | 70.0                   |
| miR-1271-5p     | 1229     | 53.0                   |
| miR-128-3p      | 2018     | 87.1                   |
| miR-129-2-3p    | 236      | 10.2                   |
| miR-129-5p      | 152      | 6.6                    |

SUPPLEMENTARY DATA

|                      |      |      |
|----------------------|------|------|
| <b>miR-1301-3p</b>   | 816  | 35.2 |
| <b>miR-1304-3p</b>   | 172  | 7.4  |
| <b>miR-1306-5p</b>   | 645  | 27.8 |
| <b>miR-1307-3p</b>   | 312  | 13.5 |
| <b>miR-1307-5p</b>   | 150  | 6.5  |
| <b>miR-130a-3p</b>   | 1989 | 85.8 |
| <b>miR-130b-3p</b>   | 955  | 41.2 |
| <b>miR-130b-5p</b>   | 438  | 18.9 |
| <b>miR-132-3p</b>    | 695  | 30.0 |
| <b>miR-133a-3p</b>   | 484  | 20.9 |
| <b>miR-134-5p</b>    | 122  | 5.3  |
| <b>miR-136-3p</b>    | 138  | 6.0  |
| <b>miR-136-5p</b>    | 472  | 20.4 |
| <b>miR-139-5p</b>    | 1521 | 65.6 |
| <b>miR-140-3p</b>    | 2109 | 91.0 |
| <b>miR-141-3p</b>    | 136  | 5.9  |
| <b>miR-142-3p</b>    | 863  | 37.2 |
| <b>miR-142-5p</b>    | 2120 | 91.5 |
| <b>miR-143-3p</b>    | 819  | 35.3 |
| <b>miR-144-3p</b>    | 1751 | 75.6 |
| <b>miR-144-5p</b>    | 768  | 33.1 |
| <b>miR-145-3p</b>    | 217  | 9.4  |
| <b>miR-145-5p</b>    | 2074 | 89.5 |
| <b>miR-146a-5p</b>   | 2192 | 94.6 |
| <b>miR-146b-5p</b>   | 1275 | 55.0 |
| <b>miR-148a-3p</b>   | 2152 | 92.9 |
| <b>miR-148b-3p</b>   | 2135 | 92.1 |
| <b>miR-150-5p</b>    | 2213 | 95.5 |
| <b>miR-151a-3p</b>   | 985  | 42.5 |
| <b>miR-151a-5p</b>   | 2060 | 88.9 |
| <b>miR-151b-3p</b>   | 2188 | 94.4 |
| <b>miR-152-3p</b>    | 747  | 32.2 |
| <b>miR-154-3p</b>    | 862  | 37.2 |
| <b>miR-155-5p</b>    | 424  | 18.3 |
| <b>miR-15a-5p</b>    | 1556 | 67.2 |
| <b>miR-15b-3p</b>    | 763  | 32.9 |
| <b>miR-15b-5p</b>    | 2219 | 95.8 |
| <b>miR-16-2-3p</b>   | 841  | 36.3 |
| <b>miR-16-5p</b>     | 2282 | 98.5 |
| <b>miR-17-3p</b>     | 287  | 12.4 |
| <b>miR-17-5p</b>     | 2192 | 94.6 |
| <b>miR-181a-2-3p</b> | 1489 | 64.3 |
| <b>miR-181a-3p</b>   | 875  | 37.8 |
| <b>miR-181a-5p</b>   | 675  | 29.1 |



SUPPLEMENTARY DATA

|                    |      |      |
|--------------------|------|------|
| <b>miR-181b-5p</b> | 916  | 39.5 |
| <b>miR-181c-3p</b> | 788  | 34.0 |
| <b>miR-181c-5p</b> | 528  | 22.8 |
| <b>miR-181d-5p</b> | 871  | 37.6 |
| <b>miR-182-5p</b>  | 256  | 11.0 |
| <b>miR-183-5p</b>  | 143  | 6.2  |
| <b>miR-185-3p</b>  | 125  | 5.4  |
| <b>miR-185-5p</b>  | 2068 | 89.3 |
| <b>miR-186-5p</b>  | 2035 | 87.8 |
| <b>miR-18a-5p</b>  | 1822 | 78.6 |
| <b>miR-190a-3p</b> | 661  | 28.5 |
| <b>miR-191-5p</b>  | 2229 | 96.2 |
| <b>miR-192-5p</b>  | 1727 | 74.5 |
| <b>miR-193a-5p</b> | 575  | 24.8 |
| <b>miR-193b-3p</b> | 622  | 26.8 |
| <b>miR-194-5p</b>  | 2026 | 87.4 |
| <b>miR-195-5p</b>  | 2167 | 93.5 |
| <b>miR-197-3p</b>  | 2017 | 87.1 |
| <b>miR-199a-3p</b> | 2154 | 93.0 |
| <b>miR-199a-5p</b> | 822  | 35.5 |
| <b>miR-199b-5p</b> | 1231 | 53.1 |
| <b>miR-19a-3p</b>  | 2216 | 95.6 |
| <b>miR-19b-3p</b>  | 2234 | 96.4 |
| <b>miR-200a-3p</b> | 130  | 5.6  |
| <b>miR-200b-3p</b> | 773  | 33.4 |
| <b>miR-200c-3p</b> | 340  | 14.7 |
| <b>miR-203a-3p</b> | 110  | 4.7  |
| <b>miR-204-5p</b>  | 1405 | 60.6 |
| <b>miR-205-5p</b>  | 976  | 42.1 |
| <b>miR-206</b>     | 336  | 14.5 |
| <b>miR-20a-5p</b>  | 2213 | 95.5 |
| <b>miR-20b-5p</b>  | 1014 | 43.8 |
| <b>miR-21-3p</b>   | 157  | 6.8  |
| <b>miR-21-5p</b>   | 2235 | 96.5 |
| <b>miR-2110</b>    | 979  | 42.3 |
| <b>miR-212-3p</b>  | 926  | 40.0 |
| <b>miR-214-3p</b>  | 559  | 24.1 |
| <b>miR-215-5p</b>  | 431  | 18.6 |
| <b>miR-22-3p</b>   | 2210 | 95.4 |
| <b>miR-22-5p</b>   | 847  | 36.6 |
| <b>miR-221-3p</b>  | 2223 | 95.9 |
| <b>miR-221-5p</b>  | 650  | 28.1 |
| <b>miR-222-3p</b>  | 2125 | 91.7 |
| <b>miR-223-3p</b>  | 2238 | 96.6 |

SUPPLEMENTARY DATA

|                    |      |      |
|--------------------|------|------|
| <b>miR-223-5p</b>  | 628  | 27.1 |
| <b>miR-224-5p</b>  | 624  | 26.9 |
| <b>miR-2355-5p</b> | 737  | 31.8 |
| <b>miR-23a-3p</b>  | 2226 | 96.1 |
| <b>miR-23b-3p</b>  | 2068 | 89.3 |
| <b>miR-24-2-5p</b> | 243  | 10.5 |
| <b>miR-24-3p</b>   | 2224 | 96.0 |
| <b>miR-25-3p</b>   | 2235 | 96.5 |
| <b>miR-26a-5p</b>  | 2227 | 96.1 |
| <b>miR-26b-5p</b>  | 2223 | 95.9 |
| <b>miR-27a-3p</b>  | 2188 | 94.4 |
| <b>miR-27b-3p</b>  | 1960 | 84.6 |
| <b>miR-28-3p</b>   | 2071 | 89.4 |
| <b>miR-28-5p</b>   | 1699 | 73.3 |
| <b>miR-296-5p</b>  | 584  | 25.2 |
| <b>miR-29a-3p</b>  | 2207 | 95.3 |
| <b>miR-29b-3p</b>  | 1886 | 81.4 |
| <b>miR-29c-3p</b>  | 2206 | 95.2 |
| <b>miR-29c-5p</b>  | 964  | 41.6 |
| <b>miR-301a-3p</b> | 754  | 32.5 |
| <b>miR-301b-3p</b> | 1421 | 61.3 |
| <b>miR-30a-3p</b>  | 1283 | 55.4 |
| <b>miR-30a-5p</b>  | 2238 | 96.6 |
| <b>miR-30b-5p</b>  | 1962 | 84.7 |
| <b>miR-30c-5p</b>  | 1901 | 82.0 |
| <b>miR-30d-5p</b>  | 2225 | 96.0 |
| <b>miR-30e-3p</b>  | 188  | 8.1  |
| <b>miR-30e-5p</b>  | 2229 | 96.2 |
| <b>miR-31-3p</b>   | 101  | 4.4  |
| <b>miR-32-5p</b>   | 1294 | 55.8 |
| <b>miR-320a</b>    | 2212 | 95.5 |
| <b>miR-320b</b>    | 1667 | 71.9 |
| <b>miR-320c</b>    | 522  | 22.5 |
| <b>miR-320d</b>    | 197  | 8.5  |
| <b>miR-323a-3p</b> | 727  | 31.4 |
| <b>miR-324-3p</b>  | 1126 | 48.6 |
| <b>miR-324-5p</b>  | 1259 | 54.3 |
| <b>miR-326</b>     | 476  | 20.5 |
| <b>miR-329-3p</b>  | 1089 | 47.0 |
| <b>miR-330-3p</b>  | 152  | 6.6  |
| <b>miR-331-3p</b>  | 866  | 37.4 |
| <b>miR-335-3p</b>  | 135  | 5.8  |
| <b>miR-335-5p</b>  | 1158 | 50.0 |
| <b>miR-337-3p</b>  | 342  | 14.8 |

SUPPLEMENTARY DATA

|                     |      |      |
|---------------------|------|------|
| <b>miR-337-5p</b>   | 148  | 6.4  |
| <b>miR-338-3p</b>   | 724  | 31.2 |
| <b>miR-338-5p</b>   | 123  | 5.3  |
| <b>miR-339-3p</b>   | 128  | 5.5  |
| <b>miR-339-5p</b>   | 943  | 40.7 |
| <b>miR-33a-3p</b>   | 746  | 32.2 |
| <b>miR-340-5p</b>   | 1267 | 54.7 |
| <b>miR-342-3p</b>   | 2250 | 97.1 |
| <b>miR-342-5p</b>   | 373  | 16.1 |
| <b>miR-345-5p</b>   | 507  | 21.9 |
| <b>miR-34a-3p</b>   | 669  | 28.9 |
| <b>miR-34a-5p</b>   | 322  | 13.9 |
| <b>miR-34c-5p</b>   | 1171 | 50.5 |
| <b>miR-361-5p</b>   | 716  | 30.9 |
| <b>miR-3613-3p</b>  | 1190 | 51.4 |
| <b>miR-3615</b>     | 1042 | 45.0 |
| <b>miR-362-3p</b>   | 1360 | 58.7 |
| <b>miR-363-3p</b>   | 1711 | 73.8 |
| <b>miR-365a-3p</b>  | 1232 | 53.2 |
| <b>miR-374a-5p</b>  | 736  | 31.8 |
| <b>miR-374b-5p</b>  | 1246 | 53.8 |
| <b>miR-375</b>      | 794  | 34.3 |
| <b>miR-376a-3p</b>  | 548  | 23.7 |
| <b>miR-376b-3p</b>  | 1027 | 44.3 |
| <b>miR-376c-3p</b>  | 1219 | 52.6 |
| <b>miR-377-3p</b>   | 869  | 37.5 |
| <b>miR-378a-3p</b>  | 652  | 28.1 |
| <b>miR-378a-5p</b>  | 422  | 18.2 |
| <b>miR-381-3p</b>   | 774  | 33.4 |
| <b>miR-382-3p</b>   | 886  | 38.2 |
| <b>miR-409-3p</b>   | 433  | 18.7 |
| <b>miR-409-5p</b>   | 709  | 30.6 |
| <b>miR-411-3p</b>   | 122  | 5.3  |
| <b>miR-423-3p</b>   | 1792 | 77.3 |
| <b>miR-423-5p</b>   | 2053 | 88.6 |
| <b>miR-424-3p</b>   | 111  | 4.8  |
| <b>miR-424-5p</b>   | 1821 | 78.6 |
| <b>miR-425-3p</b>   | 970  | 41.9 |
| <b>miR-425-5p</b>   | 1707 | 73.7 |
| <b>miR-432-5p</b>   | 1242 | 53.6 |
| <b>miR-433-3p</b>   | 1515 | 65.4 |
| <b>miR-4429</b>     | 877  | 37.9 |
| <b>miR-4433a-5p</b> | 503  | 21.7 |
| <b>miR-4433b-3p</b> | 280  | 12.1 |

SUPPLEMENTARY DATA

|                     |      |      |
|---------------------|------|------|
| <b>miR-4433b-5p</b> | 2054 | 88.6 |
| <b>miR-4446-3p</b>  | 2107 | 90.9 |
| <b>miR-451a</b>     | 2240 | 96.7 |
| <b>miR-452-5p</b>   | 130  | 5.6  |
| <b>miR-454-3p</b>   | 113  | 4.9  |
| <b>miR-4732-5p</b>  | 469  | 20.2 |
| <b>miR-4770</b>     | 1181 | 51.0 |
| <b>miR-483-3p</b>   | 685  | 29.6 |
| <b>miR-483-5p</b>   | 843  | 36.4 |
| <b>miR-484</b>      | 2214 | 95.6 |
| <b>miR-485-3p</b>   | 428  | 18.5 |
| <b>miR-486-3p</b>   | 667  | 28.8 |
| <b>miR-486-5p</b>   | 2272 | 98.1 |
| <b>miR-487b-3p</b>  | 536  | 23.1 |
| <b>miR-494-3p</b>   | 1592 | 68.7 |
| <b>miR-495-3p</b>   | 568  | 24.5 |
| <b>miR-496</b>      | 102  | 4.4  |
| <b>miR-497-5p</b>   | 620  | 26.8 |
| <b>miR-500a-3p</b>  | 316  | 13.6 |
| <b>miR-503-5p</b>   | 212  | 9.1  |
| <b>miR-505-3p</b>   | 680  | 29.3 |
| <b>miR-519b-5p</b>  | 925  | 39.9 |
| <b>miR-532-3p</b>   | 1643 | 70.9 |
| <b>miR-532-5p</b>   | 1262 | 54.5 |
| <b>miR-542-3p</b>   | 965  | 41.6 |
| <b>miR-543</b>      | 319  | 13.8 |
| <b>miR-545-5p</b>   | 225  | 9.7  |
| <b>miR-548e-3p</b>  | 1147 | 49.5 |
| <b>miR-550a-3p</b>  | 372  | 16.1 |
| <b>miR-564</b>      | 1007 | 43.5 |
| <b>miR-574-3p</b>   | 1919 | 82.8 |
| <b>miR-576-5p</b>   | 166  | 7.2  |
| <b>miR-582-3p</b>   | 816  | 35.2 |
| <b>miR-582-5p</b>   | 903  | 39.0 |
| <b>miR-584-5p</b>   | 404  | 17.4 |
| <b>miR-589-5p</b>   | 705  | 30.4 |
| <b>miR-590-3p</b>   | 226  | 9.8  |
| <b>miR-590-5p</b>   | 591  | 25.5 |
| <b>miR-596</b>      | 202  | 8.7  |
| <b>miR-598-3p</b>   | 135  | 5.8  |
| <b>miR-613</b>      | 424  | 18.3 |
| <b>miR-616-5p</b>   | 1091 | 47.1 |
| <b>miR-624-5p</b>   | 111  | 4.8  |
| <b>miR-625-3p</b>   | 481  | 20.8 |

SUPPLEMENTARY DATA

|                     |      |      |
|---------------------|------|------|
| <b>miR-627-5p</b>   | 569  | 24.6 |
| <b>miR-628-3p</b>   | 1012 | 43.7 |
| <b>miR-642a-5p</b>  | 887  | 38.3 |
| <b>miR-6511b-3p</b> | 1819 | 78.5 |
| <b>miR-652-3p</b>   | 1755 | 75.7 |
| <b>miR-652-5p</b>   | 263  | 11.4 |
| <b>miR-654-3p</b>   | 167  | 7.2  |
| <b>miR-654-5p</b>   | 176  | 7.6  |
| <b>miR-656-3p</b>   | 1158 | 50.0 |
| <b>miR-659-3p</b>   | 270  | 11.7 |
| <b>miR-660-5p</b>   | 954  | 41.2 |
| <b>miR-664a-3p</b>  | 984  | 42.5 |
| <b>miR-664a-5p</b>  | 154  | 6.6  |
| <b>miR-664b-3p</b>  | 1680 | 72.5 |
| <b>miR-6803-3p</b>  | 145  | 6.3  |
| <b>miR-7-1-3p</b>   | 189  | 8.2  |
| <b>miR-7-5p</b>     | 169  | 7.3  |
| <b>miR-744-5p</b>   | 1559 | 67.3 |
| <b>miR-766-3p</b>   | 1674 | 72.2 |
| <b>miR-769-5p</b>   | 1006 | 43.4 |
| <b>miR-7977</b>     | 1489 | 64.3 |
| <b>miR-877-3p</b>   | 130  | 5.6  |
| <b>miR-877-5p</b>   | 227  | 9.8  |
| <b>miR-885-5p</b>   | 1593 | 68.8 |
| <b>miR-9-3p</b>     | 237  | 10.2 |
| <b>miR-92a-3p</b>   | 2238 | 96.6 |
| <b>miR-92b-3p</b>   | 1001 | 43.2 |
| <b>miR-93-3p</b>    | 361  | 15.6 |
| <b>miR-93-5p</b>    | 2197 | 94.8 |
| <b>miR-941</b>      | 1119 | 48.3 |
| <b>miR-942-5p</b>   | 333  | 14.4 |
| <b>miR-95-3p</b>    | 110  | 4.7  |
| <b>miR-96-5p</b>    | 324  | 14.0 |
| <b>miR-98-3p</b>    | 152  | 6.6  |
| <b>miR-98-5p</b>    | 580  | 25.0 |
| <b>miR-99a-5p</b>   | 1650 | 71.2 |
| <b>miR-99b-5p</b>   | 1847 | 79.7 |
| <b>piRNA-12151</b>  | 2308 | 99.6 |
| <b>piRNA-1340</b>   | 1377 | 59.4 |
| <b>piRNA-20101</b>  | 1724 | 74.4 |
| <b>piRNA-2096</b>   | 233  | 10.1 |
| <b>piRNA-212993</b> | 248  | 10.7 |
| <b>piRNA-218424</b> | 110  | 4.7  |
| <b>piRNA-2229</b>   | 682  | 29.4 |

SUPPLEMENTARY DATA

|                     |      |      |
|---------------------|------|------|
| <b>piRNA-22527</b>  | 694  | 30.0 |
| <b>piRNA-227919</b> | 323  | 13.9 |
| <b>piRNA-23216</b>  | 282  | 12.2 |
| <b>piRNA-232882</b> | 1316 | 56.8 |
| <b>piRNA-243353</b> | 1211 | 52.3 |
| <b>piRNA-248758</b> | 658  | 28.4 |
| <b>piRNA-251099</b> | 224  | 9.7  |
| <b>piRNA-265711</b> | 964  | 41.6 |
| <b>piRNA-2888</b>   | 2275 | 98.2 |
| <b>piRNA-2962</b>   | 1314 | 56.7 |
| <b>piRNA-31112</b>  | 1265 | 54.6 |
| <b>piRNA-32212</b>  | 186  | 8.0  |
| <b>piRNA-32519</b>  | 1074 | 46.4 |
| <b>piRNA-32636</b>  | 289  | 12.5 |
| <b>piRNA-32637</b>  | 256  | 11.0 |
| <b>piRNA-33384</b>  | 1395 | 60.2 |
| <b>piRNA-33872</b>  | 1455 | 62.8 |
| <b>piRNA-36598</b>  | 122  | 5.3  |
| <b>piRNA-36667</b>  | 440  | 19.0 |
| <b>piRNA-36772</b>  | 1110 | 47.9 |
| <b>piRNA-37355</b>  | 257  | 11.1 |
| <b>piRNA-38142</b>  | 137  | 5.9  |
| <b>piRNA-40039</b>  | 112  | 4.8  |
| <b>piRNA-40304</b>  | 1801 | 77.7 |
| <b>piRNA-40506</b>  | 228  | 9.8  |
| <b>piRNA-40766</b>  | 134  | 5.8  |
| <b>piRNA-41574</b>  | 140  | 6.0  |
| <b>piRNA-41647</b>  | 1180 | 50.9 |
| <b>piRNA-43147</b>  | 275  | 11.9 |
| <b>piRNA-43376</b>  | 1788 | 77.2 |
| <b>piRNA-44080</b>  | 100  | 4.3  |
| <b>piRNA-45809</b>  | 398  | 17.2 |
| <b>piRNA-46358</b>  | 101  | 4.4  |
| <b>piRNA-48383</b>  | 1802 | 77.8 |
| <b>piRNA-49867</b>  | 189  | 8.2  |
| <b>piRNA-49916</b>  | 1562 | 67.4 |
| <b>piRNA-51124</b>  | 1477 | 63.7 |
| <b>piRNA-51374</b>  | 510  | 22.0 |
| <b>piRNA-52468</b>  | 2111 | 91.1 |
| <b>piRNA-54042</b>  | 2286 | 98.7 |
| <b>piRNA-54043</b>  | 2285 | 98.6 |
| <b>piRNA-54782</b>  | 177  | 7.6  |
| <b>piRNA-55662</b>  | 255  | 11.0 |
| <b>piRNA-56396</b>  | 164  | 7.1  |

SUPPLEMENTARY DATA

|                    |      |      |
|--------------------|------|------|
| <b>piRNA-57322</b> | 1652 | 71.3 |
| <b>piRNA-57387</b> | 244  | 10.5 |
| <b>piRNA-57403</b> | 1436 | 62.0 |
| <b>piRNA-57576</b> | 1061 | 45.8 |
| <b>piRNA-57581</b> | 1025 | 44.2 |
| <b>piRNA-58593</b> | 181  | 7.8  |
| <b>piRNA-58596</b> | 1435 | 61.9 |
| <b>snoRNA-1209</b> | 454  | 19.6 |
| <b>snoRNA-1210</b> | 1533 | 66.2 |
| <b>snoRNA-1257</b> | 176  | 7.6  |
| <b>snoRNA-1277</b> | 2101 | 90.7 |
| <b>snoRNA-1289</b> | 198  | 8.5  |
| <b>snoRNA-1290</b> | 196  | 8.5  |
| <b>snoRNA-1291</b> | 321  | 13.9 |
| <b>snoRNA-1374</b> | 1020 | 44.0 |
| <b>snoRNA-1382</b> | 225  | 9.7  |
| <b>snoRNA-1384</b> | 553  | 23.9 |
| <b>snoRNA-1387</b> | 1214 | 52.4 |
| <b>snoRNA-1394</b> | 404  | 17.4 |
| <b>snoRNA-1399</b> | 174  | 7.5  |
| <b>snoRNA-1401</b> | 1694 | 73.1 |
| <b>snoRNA-1403</b> | 216  | 9.3  |
| <b>snoRNA-1405</b> | 439  | 18.9 |
| <b>snoRNA-1407</b> | 257  | 11.1 |
| <b>snoRNA-1408</b> | 2191 | 94.6 |
| <b>snoRNA-1409</b> | 2206 | 95.2 |
| <b>snoRNA-1413</b> | 578  | 24.9 |
| <b>snoRNA-1414</b> | 1107 | 47.8 |
| <b>snoRNA-1417</b> | 457  | 19.7 |
| <b>snoRNA-1426</b> | 1119 | 48.3 |
| <b>snoRNA-1441</b> | 2138 | 92.3 |
| <b>snoRNA-1457</b> | 727  | 31.4 |
| <b>snoRNA-1458</b> | 1204 | 52.0 |
| <b>snoRNA-1460</b> | 1767 | 76.3 |
| <b>snoRNA-1465</b> | 111  | 4.8  |
| <b>snoRNA-1466</b> | 114  | 4.9  |
| <b>snoRNA-1472</b> | 1172 | 50.6 |
| <b>snoRNA-1502</b> | 816  | 35.2 |
| <b>snoRNA-1507</b> | 428  | 18.5 |
| <b>snoRNA-1549</b> | 147  | 6.3  |
| <b>snoRNA-1550</b> | 577  | 24.9 |
| <b>snoRNA-1563</b> | 452  | 19.5 |
| <b>snoRNA-1568</b> | 331  | 14.3 |

SUPPLEMENTARY DATA

**Supplementary Table 2. Association between ex-RNAs and anthropometric, imaging, and biochemical measures of adiposity.** In age/sex-adjusted linear models, we estimated the association between insulin-associated ex-RNAs and different metrics of adiposity. Panel (A) represents regressions including individuals without diabetes ( $N \leq 2317$ ; as defined in the manuscript); panel (B) represents regressions over the entire cohort ( $N \leq 2763$ ). We performed regressions across the entire population to maximize power to detect association with imaging indices, and to include individuals with greatest metabolic dysfunction (e.g., individuals with diabetes). Given that several measures (e.g., imaging) were only performed on a subset of FHS participants,  $N$  specifies the number of observations as each regression was performed only among those participants with detectable ex-RNAs. We estimated regression coefficients as an increase in the dependent variable (e.g., BMI or visceral fat) per a 2-fold increase in plasma ex-RNA concentration. Significant associations are shown here only for those ex-RNAs that passed an FDR threshold of 0.05. P values are raw.

(A)

| Phenotype                               | N    | Estimated $\beta$ | P-value                |
|-----------------------------------------|------|-------------------|------------------------|
| Body mass index                         |      |                   |                        |
| miR-122-5p                              | 2198 | 0.38              | $1.32 \times 10^{-7}$  |
| Waist circumference                     |      |                   |                        |
| miR-122-5p                              | 2187 | 0.84              | $8.41 \times 10^{-6}$  |
| miR-616-5p                              | 1083 | 0.91              | $3.75 \times 10^{-3}$  |
| miR-301b-3p                             | 1413 | 0.46              | $7.97 \times 10^{-3}$  |
| Visceral fat quantity (log)             |      |                   |                        |
| miR-122-5p                              | 1002 | 0.053             | $5.72 \times 10^{-7}$  |
| Visceral fat quality (HU)               |      |                   |                        |
| miR-122-5p                              | 1002 | -0.43             | $3.92 \times 10^{-6}$  |
| VAT/SAT ratio (log)                     |      |                   |                        |
| miR-122-5p                              | 1002 | 0.026             | $1.49 \times 10^{-3}$  |
| Liver attenuation (HU)                  |      |                   |                        |
| miR-122-5p                              | 1030 | -0.79             | $2.15 \times 10^{-5}$  |
| Interleukin-6 (log)                     |      |                   |                        |
| miR-342-3p                              | 2180 | -0.060            | $1.76 \times 10^{-5}$  |
| miR-486-5p                              | 2202 | -0.039            | $5.23 \times 10^{-4}$  |
| miR-19b-3p                              | 2165 | -0.039            | $9.42 \times 10^{-4}$  |
| miR-191-5p                              | 2161 | -0.026            | $1.63 \times 10^{-3}$  |
| miR-16-5p                               | 2211 | -0.029            | $5.32 \times 10^{-3}$  |
| miR-30d-5p                              | 2156 | -0.028            | $1.23 \times 10^{-2}$  |
| Tumor necrosis factor receptor-II (log) |      |                   |                        |
| miR-191-5p                              | 2226 | -0.040            | $6.64 \times 10^{-16}$ |
| miR-664b-3p                             | 1678 | -0.019            | $4.92 \times 10^{-13}$ |
| miR-320b                                | 1664 | 0.026             | $4.06 \times 10^{-12}$ |
| miR-194-5p                              | 2024 | -0.035            | $1.72 \times 10^{-10}$ |
| miR-30d-5p                              | 2222 | -0.040            | $2.69 \times 10^{-9}$  |
| miR-4446-3p                             | 2104 | 0.031             | $5.86 \times 10^{-7}$  |
| miR-574-3p                              | 1918 | -0.031            | $2.89 \times 10^{-6}$  |
| miR-486-5p                              | 2269 | -0.029            | $9.46 \times 10^{-6}$  |
| miR-19b-3p                              | 2231 | -0.031            | $1.11 \times 10^{-5}$  |
| snoRNA-1210                             | 1531 | -0.020            | $1.28 \times 10^{-5}$  |
| miR-342-3p                              | 2247 | -0.032            | $9.68 \times 10^{-5}$  |



## SUPPLEMENTARY DATA

|                        |      |        |                        |
|------------------------|------|--------|------------------------|
| miR-301b-3p            | 1419 | -0.019 | $2.73 \times 10^{-4}$  |
| miR-16-5p              | 2279 | -0.022 | $2.91 \times 10^{-4}$  |
| miR-320a               | 2209 | -0.020 | $9.53 \times 10^{-3}$  |
| miR-122-5p             | 2198 | 0.014  | $2.92 \times 10^{-2}$  |
| Triglyceride-HDL ratio |      |        |                        |
| (log) miR-122-5p       | 2200 | 0.070  | $7.08 \times 10^{-14}$ |
| miR-192-5p             | 1726 | 0.067  | $6.66 \times 10^{-6}$  |
| miR-342-3p             | 2249 | 0.041  | $1.18 \times 10^{-3}$  |

SUPPLEMENTARY DATA

**Supplementary Table 3. Full pathway analysis of 16 miRNAs associated with insulin in FHS.** Table of pathway titles from WikiPathways ranked by number of input miRNAs targeting genes on each pathway and, secondarily, by number of genes targeted by those miRNA. The last column lists the total number of genes on each pathway, defining an upper limit. The table was generated by the Pathway Finder tool (see Methods).

| <b>Pathway Title</b>                               | <b>miRNAs Targeting Genes</b> | <b>Genes Targeted by miRNA</b> | <b>Total Genes on Pathway</b> |
|----------------------------------------------------|-------------------------------|--------------------------------|-------------------------------|
| Insulin Signaling                                  | 16                            | 69                             | 160                           |
| EGF/EGFR Signaling Pathway                         | 16                            | 65                             | 163                           |
| Focal Adhesion                                     | 16                            | 64                             | 191                           |
| Circadian rhythm related genes                     | 16                            | 62                             | 201                           |
| Ectoderm Differentiation                           | 16                            | 44                             | 139                           |
| Signaling Pathways in Glioblastoma                 | 16                            | 39                             | 83                            |
| Integrated Pancreatic Cancer Pathway               | 15                            | 83                             | 192                           |
| Integrated Breast Cancer Pathway                   | 15                            | 72                             | 155                           |
| MAPK Signaling Pathway                             | 15                            | 64                             | 168                           |
| Cell Cycle                                         | 15                            | 59                             | 103                           |
| DNA Damage Response (only ATM dependent)           | 15                            | 58                             | 111                           |
| BDNF signaling pathway                             | 15                            | 57                             | 144                           |
| Senescence and Autophagy in Cancer                 | 15                            | 54                             | 105                           |
| Wnt Signaling Pathway and Pluripotency             | 15                            | 49                             | 103                           |
| Regulation of Actin Cytoskeleton                   | 15                            | 47                             | 150                           |
| Adipogenesis                                       | 15                            | 44                             | 130                           |
| Oncostatin M Signaling Pathway                     | 15                            | 37                             | 65                            |
| Integrin-mediated Cell Adhesion                    | 15                            | 32                             | 101                           |
| MicroRNAs in cardiomyocyte hypertrophy             | 15                            | 32                             | 101                           |
| Wnt Signaling Pathway Netpath                      | 15                            | 26                             | 52                            |
| TGF-beta Signaling Pathway                         | 14                            | 67                             | 132                           |
| SIDS Susceptibility Pathways                       | 14                            | 59                             | 160                           |
| Mesodermal Commitment Pathway                      | 14                            | 57                             | 153                           |
| Retinoblastoma (RB) in Cancer                      | 14                            | 48                             | 90                            |
| Regulation of toll-like receptor signaling pathway | 14                            | 40                             | 141                           |
| TSH signaling pathway                              | 14                            | 38                             | 66                            |
| G1 to S cell cycle control                         | 14                            | 38                             | 68                            |
| miRNA Regulation of DNA Damage Response            | 14                            | 37                             | 87                            |
| DNA Damage Response                                | 14                            | 35                             | 68                            |
| B Cell Receptor Signaling Pathway                  | 14                            | 35                             | 97                            |
| Apoptosis                                          | 14                            | 34                             | 86                            |
| Hepatitis C and Hepatocellular Carcinoma           | 14                            | 30                             | 51                            |
| AGE/RAGE pathway                                   | 14                            | 27                             | 66                            |
| Toll-like Receptor Signaling Pathway               | 14                            | 26                             | 102                           |
| mRNA Processing                                    | 13                            | 48                             | 127                           |

## SUPPLEMENTARY DATA

|                                                                   |    |    |     |
|-------------------------------------------------------------------|----|----|-----|
| Spinal Cord Injury                                                | 13 | 44 | 119 |
| Androgen receptor signaling pathway                               | 13 | 43 | 89  |
| TNF alpha Signaling Pathway                                       | 13 | 38 | 92  |
| Leptin signaling pathway                                          | 13 | 37 | 75  |
| NRF2 pathway                                                      | 13 | 37 | 146 |
| Corticotropin-releasing hormone                                   | 13 | 36 | 93  |
| Wnt Signaling Pathway                                             | 13 | 34 | 68  |
| TCR Signaling Pathway                                             | 13 | 34 | 90  |
| Neural Crest Differentiation                                      | 13 | 30 | 101 |
| TGF-beta Receptor Signaling                                       | 13 | 28 | 56  |
| Notch Signaling Pathway                                           | 13 | 25 | 46  |
| IL-4 Signaling Pathway                                            | 13 | 25 | 54  |
| ErbB Signaling Pathway                                            | 13 | 25 | 55  |
| ATM Signaling Pathway                                             | 13 | 24 | 40  |
| Interferon type I signaling pathways                              | 13 | 24 | 54  |
| PDGF Pathway                                                      | 13 | 22 | 39  |
| Cardiac Hypertrophic Response                                     | 13 | 22 | 55  |
| Endochondral Ossification                                         | 13 | 22 | 64  |
| RANKL/RANK Signaling Pathway                                      | 13 | 20 | 55  |
| Bladder Cancer                                                    | 13 | 18 | 31  |
| TWEAK Signaling Pathway                                           | 13 | 17 | 42  |
| Physiological and Pathological Hypertrophy of the Heart           | 13 | 16 | 25  |
| G13 Signaling Pathway                                             | 13 | 16 | 40  |
| miRNAs involved in DNA damage response                            | 13 | 16 | 52  |
| p38 MAPK Signaling Pathway                                        | 13 | 15 | 34  |
| Rac1/Pak1/p38/MMP-2 pathway                                       | 12 | 31 | 67  |
| Integrated Cancer Pathway                                         | 12 | 28 | 48  |
| IL-1 signaling pathway                                            | 12 | 28 | 55  |
| Mecp2 and Associated Rett Syndrome                                | 12 | 28 | 62  |
| Apoptosis-related network due to altered Notch3 in ovarian cancer | 12 | 26 | 53  |
| Kit receptor signaling pathway                                    | 12 | 25 | 59  |
| Aryl Hydrocarbon Receptor                                         | 12 | 24 | 46  |
| Histone Modifications                                             | 12 | 24 | 66  |
| IL-6 signaling pathway                                            | 12 | 21 | 43  |
| Diurnally Regulated Genes with Circadian Orthologs                | 12 | 20 | 48  |
| Alpha 6 Beta 4 signaling pathway                                  | 12 | 16 | 33  |
| TOR Signaling                                                     | 12 | 14 | 36  |
| Cytoplasmic Ribosomal Proteins                                    | 11 | 47 | 89  |
| Myometrial Relaxation and Contraction Pathways                    | 11 | 42 | 157 |
| Calcium Regulation in the Cardiac Cell                            | 11 | 35 | 149 |
| Apoptosis Modulation and Signaling                                | 11 | 32 | 93  |
| SREBP signalling                                                  | 11 | 30 | 71  |
| G Protein Signaling Pathways                                      | 11 | 30 | 95  |
| Endoderm Differentiation                                          | 11 | 29 | 71  |

## SUPPLEMENTARY DATA

|                                                             |    |    |     |
|-------------------------------------------------------------|----|----|-----|
| Structural Pathway of Interleukin 1 (IL-1)                  | 11 | 25 | 47  |
| AMPK Signaling                                              | 11 | 25 | 69  |
| Primary Focal Segmental Glomerulosclerosis FSGS             | 11 | 25 | 72  |
| Alzheimers Disease                                          | 11 | 24 | 120 |
| FAS pathway and Stress induction of HSP regulation          | 11 | 21 | 42  |
| Folate Metabolism                                           | 11 | 20 | 67  |
| Pathogenic Escherichia coli infection                       | 11 | 19 | 55  |
| Selenium Micronutrient Network                              | 11 | 18 | 89  |
| TP53 Network                                                | 11 | 12 | 19  |
| IL17 signaling pathway                                      | 11 | 12 | 31  |
| Ovarian Infertility Genes                                   | 11 | 10 | 32  |
| Parkin-Ubiquitin Proteasomal System pathway                 | 10 | 30 | 70  |
| Copper homeostasis                                          | 10 | 29 | 54  |
| Interleukin-11 Signaling Pathway                            | 10 | 23 | 44  |
| IL-2 Signaling Pathway                                      | 10 | 20 | 42  |
| IL-5 Signaling Pathway                                      | 10 | 19 | 40  |
| IL-3 Signaling Pathway                                      | 10 | 19 | 49  |
| Allograft Rejection                                         | 10 | 19 | 79  |
| Signaling of Hepatocyte Growth Factor Receptor              | 10 | 18 | 34  |
| DNA Replication                                             | 10 | 18 | 42  |
| Trans-sulfuration and one carbon metabolism                 | 10 | 17 | 31  |
| Glycogen Metabolism                                         | 10 | 16 | 36  |
| TSLP Signaling Pathway                                      | 10 | 16 | 47  |
| Estrogen signaling pathway                                  | 10 | 14 | 23  |
| Nanoparticle-mediated activation of receptor signaling      | 10 | 12 | 28  |
| Gastric Cancer Network 2                                    | 10 | 12 | 31  |
| Vitamin B12 Metabolism                                      | 10 | 12 | 52  |
| Hypothetical Network for Drug Addiction                     | 10 | 11 | 32  |
| Amyotrophic lateral sclerosis (ALS)                         | 10 | 11 | 38  |
| Hair Follicle Development: Induction (Part 1 of 3)          | 10 | 11 | 42  |
| MAPK Cascade                                                | 10 | 10 | 29  |
| Signal Transduction of S1P Receptor                         | 10 | 9  | 25  |
| Translation Factors                                         | 9  | 29 | 51  |
| Metapathway biotransformation                               | 9  | 29 | 179 |
| Electron Transport Chain                                    | 9  | 26 | 103 |
| Proteasome Degradation                                      | 9  | 21 | 62  |
| Arrhythmogenic Right Ventricular Cardiomyopathy             | 9  | 21 | 75  |
| Cardiac Progenitor Differentiation                          | 9  | 16 | 53  |
| Parkinsons Disease Pathway                                  | 9  | 16 | 55  |
| Extracellular vesicle-mediated signaling in recipient cells | 9  | 15 | 30  |
| One Carbon Metabolism                                       | 9  | 14 | 29  |
| Serotonin Receptor 4/6/7 and NR3C Signaling                 | 9  | 13 | 19  |
| Hematopoietic Stem Cell Differentiation                     | 9  | 13 | 47  |
| IL-7 Signaling Pathway                                      | 9  | 12 | 25  |

## SUPPLEMENTARY DATA

|                                                                                |   |    |     |
|--------------------------------------------------------------------------------|---|----|-----|
| Preimplantation Embryo                                                         | 9 | 12 | 59  |
| Oxidative Stress                                                               | 9 | 10 | 31  |
| NOD pathway                                                                    | 9 | 10 | 41  |
| Aryl Hydrocarbon Receptor Pathway                                              | 9 | 10 | 46  |
| EBV LMP1 signaling                                                             | 9 | 9  | 23  |
| Transcription factor regulation in adipogenesis                                | 9 | 7  | 22  |
| miRNA Biogenesis                                                               | 9 | 5  | 6   |
| Eukaryotic Transcription Initiation                                            | 8 | 16 | 44  |
| Glycolysis and Gluconeogenesis                                                 | 8 | 14 | 49  |
| FSH signaling pathway                                                          | 8 | 13 | 27  |
| Gastric Cancer Network 1                                                       | 8 | 13 | 29  |
| Type II interferon signaling (IFNG)                                            | 8 | 12 | 37  |
| Heart Development                                                              | 8 | 11 | 47  |
| Interactome of polycomb repressive complex 2 (PRC2)                            | 8 | 10 | 16  |
| Hypertrophy Model                                                              | 8 | 10 | 20  |
| Mitochondrial Gene Expression                                                  | 8 | 9  | 20  |
| PPAR Alpha Pathway                                                             | 8 | 9  | 26  |
| Endothelin Pathways                                                            | 8 | 9  | 34  |
| Angiogenesis                                                                   | 8 | 7  | 24  |
| BMP Signalling and Regulation                                                  | 8 | 6  | 12  |
| Transcriptional activation by NRF2                                             | 8 | 6  | 15  |
| mir-124 predicted interactions with cell cycle and differentiation             | 8 | 5  | 6   |
| RalA downstream regulated genes                                                | 8 | 5  | 12  |
| Metastatic brain tumor                                                         | 8 | 5  | 14  |
| TCA Cycle Nutrient Utilization and Invasiveness of Ovarian Cancer              | 8 | 4  | 5   |
| GPCRs, Class A Rhodopsin-like                                                  | 7 | 17 | 260 |
| Factors and pathways affecting insulin-like growth factor (IGF1)-Akt signaling | 7 | 16 | 35  |
| Fluoropyrimidine Activity                                                      | 7 | 14 | 33  |
| Zinc homeostasis                                                               | 7 | 13 | 37  |
| Selenium Metabolism and Selenoproteins                                         | 7 | 13 | 47  |
| Complement and Coagulation Cascades                                            | 7 | 13 | 59  |
| Initiation of transcription and translation elongation at the HIV-1 LTR        | 7 | 11 | 32  |
| miRs in Muscle Cell Differentiation                                            | 7 | 11 | 38  |
| Oxidation by Cytochrome P450                                                   | 7 | 11 | 62  |
| Nucleotide Metabolism                                                          | 7 | 10 | 19  |
| Osteopontin Signaling                                                          | 7 | 9  | 13  |
| Fatty Acid Biosynthesis                                                        | 7 | 9  | 22  |
| EPO Receptor Signaling                                                         | 7 | 8  | 26  |
| Fatty Acid Beta Oxidation                                                      | 7 | 8  | 34  |
| IL-9 Signaling Pathway                                                         | 7 | 7  | 17  |
| Differentiation of white and brown adipocyte                                   | 7 | 7  | 25  |
| NLR Proteins                                                                   | 7 | 6  | 9   |
| Cytokines and Inflammatory Response                                            | 7 | 6  | 27  |
| Vitamin A and Carotenoid Metabolism                                            | 7 | 6  | 43  |

## SUPPLEMENTARY DATA

|                                                                 |   |    |    |
|-----------------------------------------------------------------|---|----|----|
| Trans-sulfuration pathway                                       | 7 | 5  | 10 |
| Osteoclast Signaling                                            | 7 | 5  | 16 |
| Type II diabetes mellitus                                       | 7 | 5  | 22 |
| RNA interference                                                | 7 | 4  | 5  |
| MFAP5-mediated ovarian cancer cell motility and invasiveness    | 7 | 4  | 12 |
| SRF and miRs in Smooth Muscle Differentiation and Proliferation | 7 | 4  | 17 |
| Blood Clotting Cascade                                          | 7 | 4  | 22 |
| Oxidative phosphorylation                                       | 6 | 14 | 60 |
| Nuclear Receptors                                               | 6 | 13 | 38 |
| Differentiation Pathway                                         | 6 | 12 | 48 |
| Synaptic Vesicle Pathway                                        | 6 | 11 | 51 |
| SREBF and miR33 in cholesterol and lipid homeostasis            | 6 | 10 | 18 |
| Tryptophan metabolism                                           | 6 | 10 | 46 |
| Serotonin Receptor 2 and ELK-SRF/GATA4 signaling                | 6 | 8  | 20 |
| IL1 and megakaryocytes in obesity                               | 6 | 8  | 24 |
| T-Cell Receptor and Co-stimulatory Signaling                    | 6 | 8  | 29 |
| Inflammatory Response Pathway                                   | 6 | 8  | 30 |
| Apoptosis Modulation by HSP70                                   | 6 | 7  | 19 |
| GPCRs, Other                                                    | 6 | 7  | 93 |
| Dopaminergic Neurogenesis                                       | 6 | 6  | 30 |
| Cytosine methylation                                            | 6 | 5  | 9  |
| Liver X Receptor Pathway                                        | 6 | 5  | 10 |
| Folate-Alcohol and Cancer Pathway                               | 6 | 4  | 8  |
| Triacylglyceride Synthesis                                      | 6 | 4  | 24 |
| Statin Pathway                                                  | 6 | 4  | 31 |
| ID signaling pathway                                            | 5 | 9  | 16 |
| Nuclear Receptors in Lipid Metabolism and Toxicity              | 5 | 9  | 36 |
| Melatonin metabolism and effects                                | 5 | 8  | 29 |
| Quercetin and Nf-kB/ AP-1 Induced Cell Apoptosis                | 5 | 7  | 16 |
| TarBasePathway                                                  | 5 | 6  | 17 |
| Prostaglandin Synthesis and Regulation                          | 5 | 6  | 30 |
| Constitutive Androstane Receptor Pathway                        | 5 | 6  | 32 |
| Monoamine Transport                                             | 5 | 6  | 32 |
| Cell Differentiation - Index                                    | 5 | 6  | 49 |
| Iron metabolism in placenta                                     | 5 | 5  | 12 |
| Homologous recombination                                        | 5 | 5  | 13 |
| Peptide GPCRs                                                   | 5 | 5  | 75 |
| Mitochondrial LC-Fatty Acid Beta-Oxidation                      | 5 | 4  | 17 |
| NOTCH1 regulation of human endothelial cell calcification       | 5 | 4  | 17 |
| Evolocumab Mechanism                                            | 5 | 2  | 2  |
| PCSK9-mediated LDLR degradation                                 | 5 | 2  | 2  |
| TCA Cycle                                                       | 4 | 8  | 17 |
| Overview of nanoparticle effects                                | 4 | 8  | 19 |
| Estrogen Receptor Pathway                                       | 4 | 7  | 13 |

## SUPPLEMENTARY DATA

|                                                                         |   |   |    |
|-------------------------------------------------------------------------|---|---|----|
| Sphingolipid Metabolism                                                 | 4 | 7 | 20 |
| Urea cycle and metabolism of amino groups                               | 4 | 7 | 20 |
| Striated Muscle Contraction                                             | 4 | 7 | 38 |
| TCA Cycle and PDHc                                                      | 4 | 6 | 16 |
| miRNA targets in ECM and membrane receptors                             | 4 | 5 | 41 |
| Cori Cycle                                                              | 4 | 4 | 16 |
| Farnesoid X Receptor Pathway                                            | 4 | 4 | 19 |
| Nicotine Activity on Dopaminergic Neurons                               | 4 | 4 | 22 |
| Glucuronidation                                                         | 4 | 4 | 26 |
| eIF5A regulation in response to inhibition of the nuclear export system | 4 | 3 | 4  |
| DDX1 as a regulatory component of the Drosha microprocessor             | 4 | 3 | 7  |
| Dual hijack model of Vif in HIV infection                               | 4 | 3 | 9  |
| Type III interferon signaling                                           | 4 | 3 | 10 |
| Hypoxia-mediated EMT and Stemness                                       | 4 | 1 | 2  |
| miR-517 relationship with ARCN1 and USP1                                | 3 | 5 | 5  |
| Irinotecan Pathway                                                      | 3 | 4 | 14 |
| Drug Induction of Bile Acid Pathway                                     | 3 | 4 | 17 |
| Globo Sphingolipid Metabolism                                           | 3 | 4 | 22 |
| Pilocytic astrocytoma                                                   | 3 | 3 | 4  |
| Pentose Phosphate Pathway                                               | 3 | 3 | 7  |
| Vitamin D Metabolism                                                    | 3 | 3 | 10 |
| Serotonin Transporter Activity                                          | 3 | 3 | 11 |
| Gene regulatory network modelling somitogenesis                         | 3 | 3 | 11 |
| Cholesterol Biosynthesis                                                | 3 | 3 | 15 |
| Deregulation of Rab and Rab Effector Genes in Bladder Cancer            | 3 | 3 | 16 |
| Glycerophospholipid Biosynthetic Pathway                                | 3 | 3 | 21 |
| Glutathione metabolism                                                  | 3 | 3 | 23 |
| Eicosanoid Synthesis                                                    | 3 | 3 | 24 |
| Monoamine GPCRs                                                         | 3 | 3 | 33 |
| miR-148a/miR-31/FIH1/HIF1 $\alpha$ -Notch signaling in glioblastoma     | 3 | 2 | 8  |
| Phase I biotransformations, non P450                                    | 3 | 2 | 8  |
| EV release from cardiac cells and their functional effects              | 3 | 2 | 9  |
| TFs Regulate miRNAs related to cardiac hypertrophy                      | 3 | 2 | 13 |
| FTO Obesity Variant Mechanism                                           | 3 | 1 | 8  |
| Composition of Lipid Particles                                          | 3 | 1 | 9  |
| Small Ligand GPCRs                                                      | 3 | 1 | 19 |
| GPCRs, Class B Secretin-like                                            | 2 | 4 | 24 |
| Matrix Metalloproteinases                                               | 2 | 4 | 30 |
| Osteoblast Signaling                                                    | 2 | 3 | 14 |
| Glial Cell Differentiation                                              | 2 | 2 | 7  |
| Mismatch repair                                                         | 2 | 2 | 9  |
| Alanine and aspartate metabolism                                        | 2 | 2 | 12 |
| Dopamine metabolism                                                     | 2 | 2 | 13 |
| Ganglio Sphingolipid Metabolism                                         | 2 | 2 | 13 |

## SUPPLEMENTARY DATA

|                                                                      |   |   |    |
|----------------------------------------------------------------------|---|---|----|
| ACE Inhibitor Pathway                                                | 2 | 2 | 17 |
| Tamoxifen metabolism                                                 | 2 | 2 | 21 |
| Complement Activation                                                | 2 | 2 | 22 |
| Influenza A virus infection                                          | 2 | 1 | 1  |
| Peroxisomal beta-oxidation of tetracosanoyl-CoA                      | 2 | 1 | 4  |
| Effects of Nitric Oxide                                              | 2 | 1 | 8  |
| GPCRs, Class C Metabotropic glutamate, pheromone                     | 2 | 1 | 15 |
| Butyrate-induced histone acetylation                                 | 1 | 1 | 2  |
| Catalytic cycle of mammalian Flavin-containing MonoOxygenases (FMOs) | 1 | 1 | 5  |
| Sulindac Metabolic Pathway                                           | 1 | 1 | 5  |
| Acetylcholine Synthesis                                              | 1 | 1 | 7  |
| Non-homologous end joining                                           | 1 | 1 | 7  |
| NAD Biosynthesis II (from tryptophan)                                | 1 | 1 | 8  |
| Codeine and Morphine Metabolism                                      | 1 | 1 | 8  |
| Methylation Pathways                                                 | 1 | 1 | 9  |
| Biogenic Amine Synthesis                                             | 1 | 1 | 15 |
| Sulfation Biotransformation Reaction                                 | 1 | 1 | 19 |
